# Supplementary material
Source: PubMed Central journal article supplement (PMC11104201)
Supplement: sj-pdf-1-jfm-10.1177_1098612X12440354.pdf [file sj-pdf-1-jfm-10.1177_1098612X12440354.pdf]

## Appendix 1

### Clinical pathology

Reference values (WIL Research Laboratories)

|                                                     |                                             |
|-----------------------------------------------------|---------------------------------------------|
| Haematology:                                        | Serum chemistry:                            |
| Heinz bodies 0–150 $10^3/\mu\text{l}$               | A/G ratio 0.81–1.50                         |
| Erythrocyte count 7.64–11.6 $10^6/\mu\text{l}$      | Alanine aminotransferase 51–150 U/l         |
| Haemoglobin (PCV) 28.8–50.6%                        | Albumin 3.2–4.0 g/dl                        |
| Haemoglobin 10.1–16.0 g/dl                          | Alkaline phosphatase 28–98 U/l              |
| MCH 12.0–15.0 pg                                    | Amylase 695–1050 U/l                        |
| MCHC 29.6–35.3 g/dl                                 | Aspartate aminotransferase 14–59 U/l        |
| MCV 34.4–46.9 fl                                    | Bilirubin                                   |
| Platelet count 134–698 $10^3/\mu\text{l}$           | Calcium 9.7–11.5 mg/dl                      |
| Reticulocyte count 8.3–69.8 $10^3/\mu\text{l}$      | Chloride 114–126 mEq/l                      |
| Total leukocyte count 8.2–22.7 $10^3/\mu\text{l}$   | Cholesterol 59–179 mg/dl                    |
| Differential leukocyte count                        | Creatinine 0.8–1.6 mg/dl                    |
| Basophil 0–0.05 $10^3/\mu\text{l}$                  | Creatine kinase 112–3023 U/l                |
| Eosinophil 0.14–1.71 $10^3/\mu\text{l}$             | Gamma glutamyltransferase 0.1–1.5 U/l       |
| Lymphocyte 2.45–10.91 $10^3/\mu\text{l}$            | Globulin 2.5–4.2 g/dl                       |
| Neutrophil 2.98–16.34 $10^3/\mu\text{l}$            | Glucose 4.8–9.0 mmol/l                      |
| Monocyte 0.7–4.0 $10^3/\mu\text{l}$                 | Lactate dehydrogenase 60–300 U/l            |
| Coagulation factors:                                | Magnesium 2.4–3.0 mg/dl                     |
| Activated partial thromboplastin (APTT) 11.2–17.7 s | Phosphorus 4.5–8.5 mg/dl                    |
| Prothrombin time (PT) 8.0–11.2 s                    | Potassium 3.93–6.59 mEq/l                   |
| Fibrinogen 109–168 mg/dl                            | Sodium 152–163 mEq/l                        |
| Urinalysis:                                         | Sorbitol dehydrogenase 3.0–11.0 U/l         |
| Colour and appearance descriptive                   | Total bilirubin 0.03–0.13 mg/dl             |
| Glucose $\pm$                                       | Total bile acids 0.3–13.8 $\mu\text{mol/l}$ |
| Leukocytes $\pm$                                    | Total protein 6.1–7.8 g/dl                  |
| Ketones $\pm$                                       | Triglyceride 20–148 mg/dl                   |
| Microscopy of sediment descriptive                  | Urea nitrogen 17.1–31.6 mg/dl               |
| Nitrites $\pm$                                      | Blood gases (venous):                       |
| Occult blood $\pm$                                  | pH 7.11–7.39                                |
| pH 6.0–8.5                                          | PCO <sub>2</sub> 3.7–8.1 kPa                |
| Protein $\pm$                                       |                                             |
| Specific gravity 1.0380–1.0920                      |                                             |
| Urobilinogen 0.2–1.0 mg/dl                          |                                             |
| Volume 1–42 ml                                      |                                             |

PCV = packed cell volume (haematocrit), MCH = mean corpuscular haemoglobin, MCHC = mean corpuscular haemoglobin concentration, MCV = mean corpuscular volume

### Data collected from 16 cats during phase 1 and phase 2 study

Comparison between groups and with time — yes =  $P < 0.05$ , no = no significant difference

| pH        |      |      |      |       |       |       |
|-----------|------|------|------|-------|-------|-------|
| <i>PC</i> |      |      |      |       |       |       |
| Day       | –5   | 4    | 5    | 18/28 | 19/29 | 25/35 |
| Mean      | 7.31 | 7.35 | 7.27 | 7.30  | 7.31  | 7.28  |
| SD        | 0.08 | 0.04 | 0.13 | 0.05  | 0.06  | 0.13  |
| <i>PB</i> |      |      |      |       |       |       |
| day       | –5   | 4    | 5    | 18/28 | 19/29 | 25/35 |
| mean      | 7.33 | 7.34 | 7.24 | 7.31  | 7.31  | 7.23  |
| SD        | 0.06 | 0.04 | 0.06 | 0.04  | 0.05  | 0.17  |

Between groups: no

With time: yes

| Haematocrit % |      |      |      |       |       |       |
|---------------|------|------|------|-------|-------|-------|
| <i>PC</i>     |      |      |      |       |       |       |
| Day           | -5   | 4    | 5    | 18/28 | 19/29 | 25/35 |
| Mean          | 31.5 | 27.3 | 29.2 | 26.5  | 29.2  | 32.5  |
| SD            | 3.7  | 2.4  | 3.1  | 4.7   | 3.4   | 3.3   |
| <i>PB</i>     |      |      |      |       |       |       |
| Day           | -5   | 4    | 5    | 18/28 | 19/29 | 25/35 |
| Mean          | 32.6 | 27.4 | 30.6 | 26.8  | 29.2  | 31.8  |
| SD            | 1.9  | 2.7  | 1.9  | 4.5   | 2.4   | 4.0   |

Between groups: no

With time: yes

| Activated partial thromboplastin (s) |      |      |      |       |       |       |
|--------------------------------------|------|------|------|-------|-------|-------|
| <i>PC</i>                            |      |      |      |       |       |       |
| Day                                  | -5   | 4    | 5    | 18/29 | 19/29 | 25/35 |
| Mean                                 | 12.5 | 12.3 | 12.2 | 13.3  | 12.9  | 11.6  |
| SD                                   | 1.3  | 0.7  | 1.2  | 1.3   | 1.5   | 0.9   |
| <i>PB</i>                            |      |      |      |       |       |       |
| Day                                  | -5   | 4    | 5    | 18/29 | 19/29 | 25/35 |
| Mean                                 | 13.1 | 12.6 | 12.2 | 12.4  | 12.5  | 12.2  |
| SD                                   | 0.6  | 0.6  | 1.1  | 1.2   | 0.7   | 0.9   |

Between groups: no

With time: yes

| Platelets ( $10^3/\mu\text{l}$ ) |     |     |     |       |       |       |
|----------------------------------|-----|-----|-----|-------|-------|-------|
| <i>PC</i>                        |     |     |     |       |       |       |
| Day                              | -5  | 4   | 5   | 18/28 | 19/29 | 25/35 |
| Mean                             | 444 | 476 | 520 | 407   | 386   | 456   |
| SD                               | 157 | 112 | 102 | 182   | 122   | 184   |
| <i>PB</i>                        |     |     |     |       |       |       |
| Day                              | -5  | 4   | 5   | 18/28 | 19/29 | 25/35 |
| Mean                             | 491 | 423 | 592 | 567   | 445   | 591   |
| SD                               | 114 | 206 | 90  | 62    | 241   | 132   |

Between groups: no

With time: yes (? Bio)

| Prothrombin time (s) |     |     |     |       |       |       |
|----------------------|-----|-----|-----|-------|-------|-------|
| <i>PC</i>            |     |     |     |       |       |       |
| Day                  | -5  | 4   | 5   | 18/28 | 19/29 | 25/35 |
| Mean                 | 9.5 | 8.6 | 8.3 | 8.5   | 7.7   | 8.6   |
| SD                   | 0.5 | 0.2 | 0.2 | 0.4   | 0.3   | 0.7   |
| <i>PB</i>            |     |     |     |       |       |       |
| Day                  | -5  | 4   | 5   | 18/28 | 19/29 | 25/35 |
| Mean                 | 9.6 | 8.3 | 8.2 | 8.2   | 7.6   | 8.5   |
| SD                   | 0.6 | 0.2 | 0.2 | 0.2   | 0.3   | 0.3   |

Between groups: no

With time: yes (?bio)

| Basophils ( $10^3/\mu\text{l}$ ) |      |      |      |       |       |       |
|----------------------------------|------|------|------|-------|-------|-------|
| <i>PC</i>                        |      |      |      |       |       |       |
| Day                              | -5   | 4    | 5    | 18/28 | 19/29 | 25/35 |
| Mean                             | 0.02 | 0.01 | 0.12 | 0.03  | 0.07  | 0.07  |
| SD                               | 1.67 | 1.33 | 1.63 | 0.06  | 0.07  | 0.10  |
| <i>PB</i>                        |      |      |      |       |       |       |
| Day                              | -5   | 4    | 5    | 18/28 | 19/29 | 25/35 |
| Mean                             | 0.05 | 0.05 | 0.02 | 0.04  | 0.07  | 0.13  |
| SD                               | 0.06 | 0.08 | 0.02 | 0.07  | 0.08  | 0.22  |

Between groups: no  
With time: no

| Eosinophils ( $10^3/\mu\text{l}$ ) |      |      |      |       |       |       |
|------------------------------------|------|------|------|-------|-------|-------|
| <i>PC</i>                          |      |      |      |       |       |       |
| Day                                | -5   | 4    | 5    | 18/29 | 19/29 | 25/35 |
| Mean                               | 0.67 | 0.92 | 1.01 | 0.81  | 1.15  | 0.84  |
| SD                                 | 0.21 | 0.45 | 0.34 | 0.35  | 0.42  | 0.39  |
| <i>PB</i>                          |      |      |      |       |       |       |
| Day                                | -5   | 4    | 5    | 18/29 | 19/29 | 25/35 |
| Mean                               | 0.77 | 0.94 | 1.23 | 0.65  | 0.95  | 0.91  |
| SD                                 | 0.40 | 0.37 | 0.66 | 0.23  | 0.17  | 0.65  |

Between groups: no  
With time: yes

| Fibrinogen (mg/dl) |     |     |     |       |       |       |
|--------------------|-----|-----|-----|-------|-------|-------|
| <i>PC</i>          |     |     |     |       |       |       |
| Day                | -5  | 4   | 5   | 18/29 | 19/29 | 25/35 |
| Mean               | 151 | 186 | 237 | 163   | 220   | 158   |
| SD                 | 15  | 20  | 38  | 33    | 30    | 34    |
| <i>PB</i>          |     |     |     |       |       |       |
| Day                | -5  | 4   | 5   | 18/29 | 19/29 | 25/35 |
| Mean               | 147 | 199 | 260 | 178   | 230   | 147   |
| SD                 | 17  | 15  | 35  | 18    | 22    | 16    |

Between groups: no  
With time: yes

| Lymphocytes ( $10^3/\mu\text{l}$ ) |      |      |      |       |       |       |
|------------------------------------|------|------|------|-------|-------|-------|
| <i>PC</i>                          |      |      |      |       |       |       |
| Day                                | -5   | 4    | 5    | 18/29 | 19/29 | 25/35 |
| Mean                               | 6.96 | 6.33 | 7.81 | 5.68  | 6.24  | 8.36  |
| SD                                 | 3.70 | 3.00 | 3.12 | 4.02  | 3.48  | 4.16  |
| <i>PB</i>                          |      |      |      |       |       |       |
| Day                                | -5   | 4    | 5    | 18/29 | 19/29 | 25/35 |
| Mean                               | 6.90 | 6.48 | 9.30 | 5.72  | 6.26  | 10.82 |
| SD                                 | 2.51 | 3.01 | 4.68 | 3.02  | 3.26  | 4.93  |

Between groups: no  
With time: yes

| Total leukocytes ( $10^3/\mu\text{l}$ ) |       |       |       |       |       |       |
|-----------------------------------------|-------|-------|-------|-------|-------|-------|
| <i>PC</i>                               |       |       |       |       |       |       |
| Day                                     | -5    | 4     | 5     | 18/29 | 19/29 | 25/35 |
| Mean                                    | 15.55 | 14.20 | 17.15 | 13.49 | 15.87 | 16.45 |
| SD                                      | 8.51  | 5.56  | 6.43  | 5.77  | 4.93  | 6.54  |
| <i>PB</i>                               |       |       |       |       |       |       |
| Day                                     | -5    | 4     | 5     | 18/29 | 19/29 | 25/35 |
| Mean                                    | 14.68 | 16.09 | 19.71 | 13.07 | 15.27 | 18.59 |
| SD                                      | 3.80  | 5.10  | 8.64  | 4.56  | 5.14  | 7.55  |

Between groups: no  
With time: yes

| Alanine aminotransferase (U/l) |    |    |    |       |       |       |
|--------------------------------|----|----|----|-------|-------|-------|
| <i>PC</i>                      |    |    |    |       |       |       |
| Day                            | -5 | 4  | 5  | 18/29 | 19/29 | 25/35 |
| Mean                           | 81 | 68 | 66 | 65    | 70    | 90    |
| SD                             | 37 | 26 | 26 | 16    | 17    | 18    |
| <i>PB</i>                      |    |    |    |       |       |       |
| Day                            | -5 | 4  | 5  | 18/29 | 19/29 | 25/35 |
| Mean                           | 80 | 66 | 61 | 65    | 75    | 88    |
| SD                             | 11 | 6  | 8  | 11    | 12    | 15    |

Between groups: no  
With time: yes

| Albumin (g/dl) |     |     |     |       |       |       |
|----------------|-----|-----|-----|-------|-------|-------|
| <i>PC</i>      |     |     |     |       |       |       |
| Day            | -5  | 4   | 5   | 18/29 | 19/29 | 25/35 |
| Mean           | 3.7 | 3.3 | 3.3 | 3.0   | 3.4   | 3.4   |
| SD             | 0.2 | 0.1 | 0.2 | 0.2   | 0.2   | 0.3   |
| <i>PB</i>      |     |     |     |       |       |       |
| Day            | -5  | 4   | 5   | 18/29 | 19/29 | 25/35 |
| Mean           | 3.6 | 3.4 | 3.4 | 3.0   | 3.4   | 3.5   |
| SD             | 0.1 | 0.2 | 0.1 | 0.2   | 0.2   | 0.2   |

Between groups: no  
With time: yes

| Alkaline phosphatase (U/l) |     |    |    |       |       |       |
|----------------------------|-----|----|----|-------|-------|-------|
| <i>PC</i>                  |     |    |    |       |       |       |
| Day                        | -5  | 4  | 5  | 18/29 | 19/29 | 25/35 |
| Mean                       | 100 | 84 | 84 | 90    | 79    | 105   |
| SD                         | 14  | 11 | 21 | 17    | 9     | 15    |
| <i>PB</i>                  |     |    |    |       |       |       |
| Day                        | -5  | 4  | 5  | 18/29 | 19/29 | 25/35 |
| Mean                       | 89  | 77 | 72 | 73    | 71    | 104   |
| SD                         | 21  | 18 | 19 | 18    | 20    | 25    |

Between groups: no  
With time: yes

| Aspartate transaminase (U/l) |    |    |    |       |       |       |
|------------------------------|----|----|----|-------|-------|-------|
| <i>PC</i>                    |    |    |    |       |       |       |
| Day                          | -5 | 4  | 5  | 18/29 | 19/29 | 25/35 |
| Mean                         | 36 | 31 | 19 | 34    | 19    | 40    |
| SD                           | 17 | 23 | 7  | 33    | 3     | 16    |
| <i>PB</i>                    |    |    |    |       |       |       |
| Day                          | -5 | 4  | 5  | 18/29 | 19/29 | 25/35 |
| Mean                         | 31 | 19 | 17 | 25    | 20    | 35    |
| SD                           | 11 | 2  | 4  | 6     | 6     | 9     |

Between groups: yes

With time: yes

| Calcium (mg/dl) |      |      |      |       |       |       |
|-----------------|------|------|------|-------|-------|-------|
| <i>PC</i>       |      |      |      |       |       |       |
| Day             | -5   | 4    | 5    | 18/29 | 19/29 | 25/35 |
| Mean            | 10.9 | 10.7 | 10.8 | 10.6  | 10.9  | 11.2  |
| SD              | 0.3  | 0.3  | 0.3  | 0.4   | 0.4   | 0.7   |
| <i>PB</i>       |      |      |      |       |       |       |
| Day             | -5   | 4    | 5    | 18/29 | 19/29 | 25/35 |
| Mean            | 10.6 | 10.8 | 10.7 | 10.3  | 11.0  | 11.1  |
| SD              | 0.3  | 0.3  | 0.4  | 0.4   | 0.5   | 0.7   |

Between groups: no

With time: yes

| Creatine kinase (U/l) |      |      |     |       |       |       |
|-----------------------|------|------|-----|-------|-------|-------|
| <i>PC</i>             |      |      |     |       |       |       |
| Day                   | -5   | 4    | 5   | 18/29 | 19/29 | 25/35 |
| Mean                  | 1816 | 1483 | 475 | 722   | 447   | 1329  |
| SD                    | 2562 | 1855 | 573 | 969   | 280   | 1385  |
| <i>PB</i>             |      |      |     |       |       |       |
| Day                   | -5   | 4    | 5   | 18/29 | 19/29 | 25/35 |
| Mean                  | 840  | 284  | 337 | 914   | 332   | 1008  |
| SD                    | 525  | 178  | 236 | 1017  | 421   | 723   |

Between groups: no

With time: no

| Blood urea nitrogen (mg/dl) |      |      |      |       |       |       |
|-----------------------------|------|------|------|-------|-------|-------|
| <i>PC</i>                   |      |      |      |       |       |       |
| Day                         | -5   | 4    | 5    | 18/29 | 19/29 | 25/35 |
| Mean                        | 26.0 | 22.4 | 27.4 | 22.1  | 24.0  | 26.6  |
| SD                          | 3.0  | 3.1  | 3.4  | 2.7   | 4.0   | 3.1   |
| <i>PB</i>                   |      |      |      |       |       |       |
| Day                         | -5   | 4    | 5    | 18/29 | 19/29 | 25/35 |
| Mean                        | 25.7 | 23.0 | 27.1 | 23.6  | 27.2  | 26.8  |
| SD                          | 3.6  | 1.7  | 3.6  | 1.4   | 4.8   | 2.3   |

Between groups: no

With time: yes

| Creatinine (mg/dl) |     |     |     |       |       |       |
|--------------------|-----|-----|-----|-------|-------|-------|
| <i>PC</i>          |     |     |     |       |       |       |
| Day                | -5  | 4   | 5   | 18/29 | 19/29 | 25/35 |
| Mean               | 0.8 | 0.8 | 0.8 | 0.7   | 0.8   | 0.9   |
| SD                 | 0.2 | 0.2 | 0.1 | 0.1   | 0.2   | 0.2   |
| <i>PB</i>          |     |     |     |       |       |       |
| Day                | -5  | 4   | 5   | 18/29 | 19/29 | 25/35 |
| Mean               | 0.8 | 0.8 | 0.8 | 0.7   | 0.8   | 0.9   |
| SD                 | 0.2 | 0.1 | 0.2 | 0.2   | 0.2   | 0.2   |

Between groups: no

With time: yes

| Amylase (U/l) |     |     |     |       |       |       |
|---------------|-----|-----|-----|-------|-------|-------|
| <i>PC</i>     |     |     |     |       |       |       |
| Day           | -5  | 4   | 5   | 18/29 | 19/29 | 25/35 |
| Mean          | 831 | 851 | 887 | 759   | 851   | 891   |
| SD            | 140 | 104 | 119 | 81    | 111   | 127   |
| <i>PB</i>     |     |     |     |       |       |       |
| Day           | -5  | 4   | 5   | 18/29 | 19/29 | 25/35 |
| Mean          | 880 | 879 | 941 | 843   | 913   | 855   |
| SD            | 136 | 96  | 102 | 71    | 141   | 107   |

Between groups: no

With time: yes
